# Supplementary material
Source: PubMed Central journal article supplement (PMC2967219)

Medical

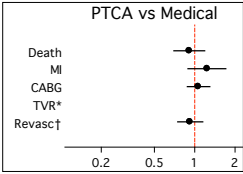

PTCA

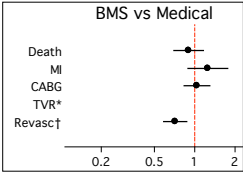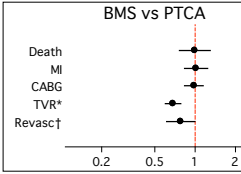

BMS

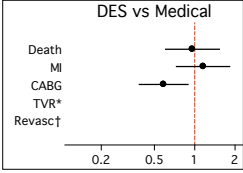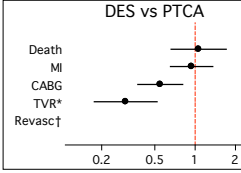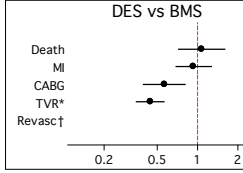

DES

Supplement: NIHMS242064-supplement-Figure_3.pdf [file NIHMS242064-supplement-Figure_3.pdf]
